# Supplementary material for: Neoadjuvant Dual Checkpoint Inhibitors vs Anti-PD1 Therapy in High-Risk Resectable Melanoma: A Pooled Analysis
Source: PubMed Central journal article supplement (PMC10979364; doi:10.1001/jamaoncol.2023.7333), 2024-03-28
Supplement: jamaoncol-e237333-s001.pdf [file jamaoncol-e237333-s001.pdf]

## Supplemental Online Content

Mangla A, Lee CM, Mirsky MM, et al. Neoadjuvant dual checkpoint inhibitors vs anti-PD1 therapy in high-risk resectable melanoma: a pooled analysis. *JAMA Oncol*. Published March 28, 2024. doi:10.1001/jamaoncol.2023.7333

**eTable 1.** Definitions of radiologic and pathologic responses as listed in the studies evaluating neoadjuvant checkpoint inhibitors in melanoma

**eTable 2.** Outcomes comparing alternative dose of ipilimumab and nivolumab vs anti-PD1 monotherapy in the neoadjuvant setting

**eTable 3.** Outcomes comparing conventional dose of ipilimumab and nivolumab vs anti-PD1 monotherapy in the neoadjuvant setting

**eTable 4.** Adverse events reports in the neoadjuvant checkpoint inhibitor trials in melanoma

**eMethods.** Supplemental methods

**eReferences**

This supplemental material has been provided by the authors to give readers additional information about their work.

| Quantitative measure                                         | Definition                                                              |
|--------------------------------------------------------------|-------------------------------------------------------------------------|
| <b><i>Pathologic Responses</i></b>                           |                                                                         |
| Pathologic Complete Response (pCR)                           | No viable tumor seen on pathologic examination                          |
| Near Complete pathologic response (pNCR)                     | Less than 10% of viable tumor seen on pathologic examination            |
| Partial response (pPR)                                       | More than 10% but less than 50% of viable tumor seen on pathologic exam |
| More than partial response (>pPR)                            | More than 50% of viable tumor seen on pathologic exam                   |
| <b><i>Radiologic Response (used RECIST 1.1 criteria)</i></b> |                                                                         |
| Complete Response                                            | Complete resolution of target lesion on radiologic exam                 |
| Partial Response                                             | More than 50% reduction of target lesion on radiologic exam             |
| Stable Disease                                               | Less than 50% resolution or less than 20% growth on radiologic exam     |
| Progressive disease                                          | More than 20% growth on radiologic exam                                 |

**eTable 1.** Definitions of radiologic and pathologic responses as listed in the studies evaluating neoadjuvant checkpoint inhibitors in melanoma

|                               | Alternative Dose* | Anti-PD1** | Odds ratio | 95% CI       | P-value         |
|-------------------------------|-------------------|------------|------------|--------------|-----------------|
| Total patients                | 129               | 182        |            |              |                 |
| Radiologic Response Evaluated | 129               | 160        |            |              |                 |
| rCR                           | 17 (13.2)         | 9 (5.6)    | 2.55       | 1.1 to 5.92  | <b>0.03</b>     |
| rOOR                          | 62 (48.1)         | 75 (46.9)  | 1.05       | 0.66 to 1.67 | 0.84            |
| rPD                           | 15 (11.6)         | 25 (15.6)  | 0.71       | 0.36 to 1.41 | 0.33            |
| Pathologic slides available   | 129               | 173        |            |              |                 |
| pCR                           | 65 (50.4)         | 36 (20.8)  | 3.87       | 2.34 to 6.4  | <b>&lt;0.01</b> |
| Adverse Events                |                   |            |            |              |                 |
| Grade 3 or 4 irAE             | 28 (21.7)         | 22 (13.8)  | 2.02       | 1.09 to 3.72 | <b>&lt;0.02</b> |
| Unable to complete NAT        | 15 (11.6)         | 14 (8.8)   | 1.58       | 0.73 to 3.39 | 0.24            |
| Planned surgical resection    | 119 (92.3)        | 166 (91.2) | 0.87       | 0.38 to 1.99 | 0.74            |

**eTable 2.** Outcomes comparing alternative dose of ipilimumab and nivolumab vs anti-PD1 monotherapy in the neoadjuvant setting

CI- Confidence Interval; irAE- Immunotherapy-related Adverse Event; NAT- Neoadjuvant therapy; rOOR- Radiologic Overall Objective Response; pCR-Pathologic Complete Response; PD-1- Programmed cell death protein-1; rCR- Radiologic Complete Response; rPD- Radiologic Progressive Disease.

\* Alternative Dose- Ipilimumab 1mg/kg + Nivolumab 3mg/kg

\*\*Anti-PD1- Includes both pembrolizumab and nivolumab as monotherapy.

|  | Conventional Dose* (%) | Anti-PD1** (%) | Odds ratio | 95% CI | P-value |
|--|------------------------|----------------|------------|--------|---------|
|--|------------------------|----------------|------------|--------|---------|

|                               |           |            |      |               |                 |
|-------------------------------|-----------|------------|------|---------------|-----------------|
| Total patients                | 51        | 182        |      |               |                 |
| Radiologic Response Evaluated | 49        | 160        |      |               |                 |
| rCR                           | 3 (6.1)   | 9 (5.6)    | 1.09 | 0.28 to 4.21  | 0.9             |
| rOOR                          | 31 (63.3) | 75 (46.9)  | 1.95 | 1.01 to 3.77  | <b>0.046</b>    |
| rPD                           | 4 (8.2)   | 25 (15.6)  | 0.48 | 0.16 to 1.45  | 0.19            |
| Pathologic slides available   | 50        | 173        |      |               |                 |
| pCR                           | 22 (44)   | 36 (20.8)  | 2.99 | 1.53 to 5.83  | <b>&lt;0.01</b> |
| Adverse Events                |           |            |      |               |                 |
| Grade 3 or 4 irAE             | 29 (56.9) | 22 (12.3)  | 9.59 | 4.71 to 19.52 | <b>&lt;0.01</b> |
| Unable to complete NAT        | 13 (25.5) | 14 (7.7)   | 4.11 | 1.78 to 9.44  | <b>&lt;0.01</b> |
| Planned surgical resection    | 51 (100)  | 166 (91.2) | 0.1  | 0.01 to 1.66  | 0.11            |

**eTable 3.** Outcomes comparing conventional dose of ipilimumab and nivolumab vs anti-PD1 monotherapy in the neoadjuvant setting

CI- Confidence Interval; irAE- Immunotherapy-related Adverse Event; NAT- Neoadjuvant therapy; rOOR- Radiologic Overall Objective Response; pCR-Pathologic Complete Response; PD-1- Programmed cell death protein-1; rCR- Radiologic Complete Response; rPD- Radiologic Progressive Disease.

\* Conventional Dose- Ipilimumab 3mg/kg + Nivolumab 1mg/kg

\*\*Anti-PD1- Includes both pembrolizumab and nivolumab as monotherapy.

|                             | Number of patients | Patients receiving all NAT doses | Reason for NAT discontinuation | Patients completing the entire planned length of treatment | Patients receiving planned resection | Grade 3/4 AE during NAT | Most common Grade 3 AE during NAT                               | Grade 3 or 4 AE during adjuvant therapy | Most common Grade 3 AE during adjuvant therapy                                 |
|-----------------------------|--------------------|----------------------------------|--------------------------------|------------------------------------------------------------|--------------------------------------|-------------------------|-----------------------------------------------------------------|-----------------------------------------|--------------------------------------------------------------------------------|
| <b>Amaria et al. 2018</b>   |                    |                                  |                                |                                                            |                                      |                         |                                                                 |                                         |                                                                                |
| Nivolumab                   | 12                 | 12                               | --                             | --                                                         | 10                                   | 1 (8%)                  | Tumor pain                                                      | 2 (20%)                                 | Colitis<br>DKA                                                                 |
| Ipilimumab + Nivolumab      | 11                 | 4                                |                                | --                                                         | 11                                   | 8 (73%)                 | Transaminitis<br>Colitis<br>Pneumonia                           | 2 (18%)                                 | Hypophysitis                                                                   |
| <b>Blank et al. 2018</b>    |                    |                                  |                                |                                                            |                                      |                         |                                                                 |                                         |                                                                                |
| NAT arm                     | 10                 | 8                                | NR                             | 1                                                          | 10                                   | 9 (90%)                 | Colitis<br>Elevated Lipase<br>Dermatitis/ Rash<br>Transaminitis | --                                      | --                                                                             |
| Adjuvant arm                | 10                 | --                               |                                | 1                                                          | 10                                   | --                      | --                                                              | 9 (90%)                                 | Elevated lipase<br>Colitis/ Diarrhea<br>Adrenal insufficiency<br>Transaminitis |
| <b>Huang et al. 2019</b>    |                    |                                  |                                |                                                            |                                      |                         |                                                                 |                                         |                                                                                |
| NAT phase                   | 29                 | 29                               | --                             | --                                                         | 29                                   | 3                       | Rash                                                            | NR                                      | NR                                                                             |
| <b>Rozeman et al. 2019</b>  |                    |                                  |                                |                                                            |                                      |                         |                                                                 |                                         |                                                                                |
| Ipi 3 + Nivo 1              | 30                 | 26                               | irAE-4                         | 30                                                         | 30                                   | 12 (40%)                | Transaminitis                                                   | --                                      | --                                                                             |
| Ipi 1 + Nivo 3              | 30                 | 25                               | irAE-5                         | 29                                                         | 29                                   | 6 (20%)                 | Transaminitis                                                   | --                                      | --                                                                             |
| Ipi 3 & Nivo 3 <sup>1</sup> | 26                 | 18                               | irAE-8                         | 24                                                         | 24                                   | 13 (50%)                | Colitis                                                         | --                                      | --                                                                             |

| <b>Amaria et al. 2022</b>                                            |      |     |                                                                |      |      |          |                                               |          |                                                                      |
|----------------------------------------------------------------------|------|-----|----------------------------------------------------------------|------|------|----------|-----------------------------------------------|----------|----------------------------------------------------------------------|
| NAT phase                                                            | 30   | 29  | PD- 1                                                          | --   | 29   | 0        | --                                            | --       | --                                                                   |
| Adjuvant Phase                                                       | 27   | --  |                                                                | 18   | --   | --       | --                                            | 7 (26%)  | Adrenal Insufficiency<br>Transaminitis<br>Arthralgia<br>Hyponatremia |
| <b>Reijers et al. 2022</b>                                           |      |     |                                                                |      |      |          |                                               |          |                                                                      |
| NAT arm†                                                             | 99   | 89  | - PD- 6<br>- irAE- 3                                           | 89   | 90   | 22 (22%) | Transaminitis<br>Colitis and diarrhea<br>Rash | --       | --                                                                   |
| <b>Patel 2023 (As per data available at the time of publication)</b> |      |     |                                                                |      |      |          |                                               |          |                                                                      |
| NAT-<br>adjuvant<br>arm                                              | 144* | 127 | - PD- 12<br>- irAE- 1<br>- Consent<br>withdraw- 2<br>- Other-1 | 50** | 127* | 18 (12%) | Transaminitis                                 | --       | --                                                                   |
| Adjuvant<br>only arm                                                 | 151* | --  |                                                                | 38** | 151* | --       | --                                            | 22 (14%) | Maculopapular Rash<br>Pruritis<br>Vomiting                           |

**eTable 4.** Adverse events reports in the neoadjuvant checkpoint inhibitor trials in melanoma

AE- Adverse Event; CK- Creatinine Kinase; DKA- Diabetic Ketoacidosis; Ipi- Ipilimumab, irAE- Immune Related Adverse Event; Nivo- Nivolumab; NAT- Neoadjuvant Therapy; NR- Not reported; PD- Progressive Disease

Group C was closed prematurely due to severe Grade 3-4 AE in this group.

† Adjuvant therapy was not standardized in patients.

\*Data of patients available at the time of analysis. Three patients withdrew consent or defected, hence only 141 patients used for statical analysis.

\*\*At the time of data cut-off these patients completed the protocol specified goals. In the NAT-arm, 14 patients in the NAT-adjuvant arm and 21 patients in the adjuvant-only arm did not receive adjuvant therapy after surgery.

## eMethods

The odds ratio (OR), its standard error and 95% confidence interval are calculated according to Altman, 1991.

1. The odds ratio is given by:

$$OR = \frac{a/b}{c/d} \\ = \frac{a \times d}{b \times c}$$

|                   | Positive outcome | Negative outcome |
|-------------------|------------------|------------------|
| Exposed group     | a                | b                |
| Non-Exposed group | c                | d                |

2. Standard error of the log odds ratio

$$SE\{\ln(OR)\} = \sqrt{\frac{1}{a} + \frac{1}{b} + \frac{1}{c} + \frac{1}{d}}$$

3. 95% confidence interval is calculated using this equation:

$$95\% \text{ CI} = \exp\left(\ln(OR) - 1.96 \times SE\{\ln(OR)\}\right) \quad \text{to} \quad \exp\left(\ln(OR) + 1.96 \times SE\{\ln(OR)\}\right)$$

Where zeros cause problems with computation of the odds ratio or its standard error, 0.5 is added to all cells (a, b, c, d) (Pagano & Gauvreau, 2000; Deeks & Higgins, 2010).

Test of significance: the P-value is calculated according to Sheskin, 2004 (p. 542). A standard normal deviate (z-value) is calculated as  $\ln(\text{OR})/\text{SE}\{\ln(\text{OR})\}$ , and the P-value is the area of the normal distribution that falls outside  $\pm z$



eReferences:

1. Altman DG (1991) Practical statistics for medical research. London: Chapman and Hall.
2. Altman DG, Deeks JJ, Sackett DL. [Odds ratios should be avoided when events are common \[letter\]](#). BMJ 1998;317:1318.
3. Deeks JJ, Higgins JPT (2010) Statistical algorithms in Review Manager 5. Retrieved from <https://training.cochrane.org/>
4. Kirkwood BR, Sterne JAC (2003) Essential medical statistics, 2<sup>nd</sup> ed. Oxford: Blackwell Science.
5. Pagano M, Gauvreau K (2000) Principles of biostatistics. 2nd ed. Belmont, CA: Brooks/Cole.
6. Parshall MB (2013) Unpacking the 2 x 2 table. Heart & Lung 42:221-226.
7. Sheskin DJ (2004) Handbook of parametric and nonparametric statistical procedures. 3<sup>rd</sup> ed. Boca Raton: Chapman & Hall /CRC.
