# Supplementary material for: Neoadjuvant Dual Checkpoint Inhibitors vs Anti-PD1 Therapy in High-Risk Resectable Melanoma: A Pooled Analysis
Source: PubMed Central journal article supplement (PMC10979364; doi:10.1001/jamaoncol.2023.7333), 2024-03-28
Supplement: jamaoncol-e237333-s002.pdf [file jamaoncol-e237333-s002.pdf]

## Data Sharing Statement

Mangla. Efficacy and Safety of Neoadjuvant Dual Checkpoint Inhibition in High-Risk Resectable Melanoma. *JAMA Oncol.* Published March 28, 2024.  
doi:10.1001/jamaoncol.2023.7333

### Data

**Data available:** No
